1 A Multi-State Birth-Death model for Bayesian inference of  
2 lineage-specific birth and death rates

3 Joëlle Barido-Sottani<sup>1,2,\*</sup>, Timothy G. Vaughan<sup>1,2</sup>, and Tanja Stadler<sup>1,2,\*</sup>

4 <sup>1</sup>*Department of Biosystems Science and Engineering, ETH Zürich, Basel,*  
5 *Switzerland*

6 <sup>2</sup>*Swiss Institute of Bioinformatics (SIB), Switzerland*

7 \* *Correspondence to be addressed to: joelle.barido-sottani@m4x.org;*  
8 *tanja.stadler@bsse.ethz.ch*

9 **Abstract**

10 Heterogeneous populations can lead to important differences in birth and death rates across a  
11 phylogeny. Taking this heterogeneity into account is thus critical to obtain accurate estimates of  
12 the underlying population dynamics. We present a new multi-state birth-death model (MSBD)  
13 that can estimate lineage-specific birth and death rates. For species phylogenies, this corresponds  
14 to estimating lineage-dependent speciation and extinction rates. Contrary to existing models,  
15 we do not require a prior hypothesis on a trait driving the rate differences and we allow the same  
16 rates to be present in different parts of the phylogeny. Using simulated datasets, we show that  
17 the MSBD model can reliably infer the presence of multiple evolutionary regimes, their positions  
18 in the tree, and the birth and death rates associated with each. We also present a re-analysis of  
19 two empirical datasets and compare the results obtained by MSBD and by the existing software  
20 BAMM. The MSBD model is implemented as a package in the Bayesian inference software  
21 BEAST2, which allows joint inference of the phylogeny and the model parameters.

## 22 **Significance statement**

23 Phylogenetic trees can inform about the underlying speciation and extinction processes within  
24 a species clade. Many different factors, for instance environmental changes or morphological  
25 changes, can lead to differences in macroevolutionary dynamics within a clade. We present here  
26 a new multi-state birth-death (MSBD) model that can detect these differences and estimate both  
27 the position of changes in the tree and the associated macroevolutionary parameters. The MSBD  
28 model does not require a prior hypothesis on which trait is driving the changes in dynamics and  
29 is thus applicable to a wide range of datasets. It is implemented as an extension to the existing  
30 framework BEAST2.

## 1 Introduction

Model-based phylogenetic and phylodynamic inferences are widely used to study both epidemics and macroevolution by using genetic sequences to reconstruct evolutionary processes. In many cases, the underlying population is structured, i.e it is composed of many different subpopulations which are subject to different evolutionary dynamics. Ignoring this structure and the resulting lineage-specific changes in evolutionary parameters can lead to biases in the inferred phylogeny and parameter estimates [1].

Multi-state birth-death models have been widely used to model population structure and analyze phylogenies built from individuals in a structured population [2, 3, 4, 5], both in epidemiological and macroevolutionary applications. These models contain a series of discrete states with state-specific birth and death rates, such that each state corresponds to a specific evolutionary regime. Based on a phylogeny where each tip is associated with a state, the state-dependent birth-and death rates are estimated. Birth events correspond to transmission events in epidemiology and speciation events in macroevolution, while death events correspond to becoming-non-infectious events in epidemiology and extinction events in macroevolution. A state might be for example a geographic location or the presence of a particular trait.

The Binary State Speciation and Extinction (BiSSE, [2]) and its extension to multiple states MuSSE, included in the package Diversitree [3], were the first efforts to infer state-specific birth and death rates from ultrametric phylogenies, i.e trees with all tips sampled at the same point in time, where each tip is assigned to a state. In [4], these approaches were extended to non-ultrametric trees. More recently, the Beast2 package BDMM [5] allowed the joint reconstruction of a phylogeny and quantification of the parameters of an underlying multi-state birth-death model. These approaches all have in common that the model is conditioned on a particular total number of states and the state at each tip in the phylogeny. This necessitates the formulation of a hypothesis as to which underlying feature drives the pattern of evolutionary rates. The BiSSE models in particular have been criticized for their approach being biased towards inferring trait-dependent rates regardless of the chosen trait [6]. Although this was addressed by the introduction of the HiSSE model [7] which uses a more appropriate null hypothesis, testing multiple different traits or combinations of traits would still require a different run of the inference

60 for each. Thus there is a clear need for models which do not make such strong prior assumptions  
61 on the process driving the changes in evolutionary rates.

62 The method Bayesian Analysis of Macroevolutionary Mixtures (BAMM, [8]) addresses these  
63 issues and is able to infer the number of states, assign each lineage of the tree to a state and  
64 estimate the birth- and death rate parameters associated with each state. However, its results  
65 have been called into question, as [9] identified issues regarding the calculation of its likelihood  
66 function and a strong dependency on the prior when inferring the number of states, as well as  
67 inaccurate diversification rates estimates. Some of those criticisms were addressed by [10], which  
68 showed that the simulation used in [9] contained a large number of shifts which only affected  
69 small clades of the phylogeny, making them difficult to detect. [10] also pointed out that the  
70 sensitivity to the prior decreased sharply when using the default settings of BAMM rather than  
71 the setting used by [9]. However, issues regarding the calculation of the extinction probability  
72 in the likelihood function used by BAMM have to our knowledge not been addressed. Moreover,  
73 the process of moving between states is not explicitly modelled by BAMM, which may be a  
74 contributing factor to the prior sensitivity observed in some situations. Additionally, BAMM  
75 assumes that each state emerges only once along the tree. It thus implicitly links the changes  
76 in birth and death rates to lineage-specific innovations with no innovation occurring more than  
77 once, which may not adequately represent situations where the rates are driven by environmental  
78 or geographic conditions, for instance.

79 In this paper, we present a new Bayesian method for inferring lineage-specific birth and  
80 death rates jointly with a phylogeny, using a multi-state birth-death model. This method infers  
81 the number and position of evolutionary regimes as well as the state change rate, and requires  
82 strong assumption with respect to the features driving the variation in birth and death rates.  
83 We validate the implementation of this new method and evaluate its performance on simulated  
84 datasets. We then use it to re-analyze two empirical phylogenies and compare the results to  
85 those obtained by BAMM on those trees. Finally we discuss the limitations of the method and  
86 planned future work.

## 87 **2 Results**

88 We developed and implemented the MSBD model as a package within the BEAST2 framework.  
89 It takes genetic sequences or fixed phylogenetic trees as an input. The output is the inferred  
90 trees (in the case of sequences) and an assignment of lineage-specific birth and death rates to  
91 all lineages in the tree. Changes of these rates may happen anywhere along a branch. In what  
92 follows, we will first show evidence for the correctness of our implementation in a simulation  
93 study. Then, based on simulations, we investigate the accuracy of our tool when estimating  
94 the rates and change times. Last, we will present the results of an analysis of a lizard and a  
95 hummingbird phylogeny.

### 96 **2.1 Validation: sampling from prior**

97 To assess the correctness of the implementation of our model, we compare the distributions  
98 obtained by simulating under the model and by running the MSBD inference without data. The  
99 distributions are expected to match if the model is correctly implemented.

100 The results of the simulations without extinction are shown in Figure 2. The distributions  
101 obtained by forward simulation and by sampling from the prior match perfectly for all statistics,  
102 which provides strong evidence that the MCMC method is implemented correctly.

103 As expected, the simulations with extinction do not fully match between the two methods,  
104 as the forward simulation allows for state changes in the extinct parts of the tree whereas our  
105 method assumes there were none. As shown in Figure S1, there is a slight discrepancy in the  
106 statistics linked to the tree topology, and a stronger discrepancy in the statistics linked to the  
107 state distribution.

### 108 **2.2 Accuracy of the inference**

109 We use simulated phylogenies to assess the accuracy of the inference. Some datasets were sim-  
110 ulated under the model, using a fixed set of states and a change rate  $\gamma$ . Other datasets were  
111 created by simulating two different trees under constant birth-death processes and attaching  
112 them. These joined datasets were thus characterized by the proportion  $p$  of tips in state 1 rather  
113 than  $\gamma$ .

### 114 **2.2.1 Parameter estimates**

115 We evaluated the accuracy of the parameter estimates for the birth rates, death rates and state  
116 change rates by estimating the relative error of the median estimate and the coverage on simulated  
117 datasets. The error on the birth and death rates was evaluated both as an average across all tips  
118 and as an average across the entire tree, weighted by the edge lengths.

119 The results are shown in Figure 3. Estimates for the parameter  $\gamma$  are accurate for values  
120 around 0.2, corresponding to between 1 and 3 state changes in the tree on average. However,  
121 the estimates are much worse when  $\gamma$  is high, i.e. 2.61. This is likely due to the approximation  
122 of no state changes in the unsampled parts of the tree being more violated when  $\gamma$  is high.

123 Estimates of the birth rates are very accurate, except for the estimates at the tips under  
124 high  $\gamma$ . Since the estimates averaged over the whole tree do not suffer in a similar way, this  
125 exception is likely due to mis-attributing tips to the wrong regime rather than increased error on  
126 the regimes themselves: state changes affecting edges leading to tips, which are more likely when  
127  $\gamma$  is high, cannot be detected by the inference, and will lead to tips being assigned a different  
128 state in the inference than the one recorded in the simulation. Estimates of the death rates  
129 are generally less accurate, although the true value is still in the 95% HPD interval in the vast  
130 majority of cases.

131 In conclusion, the MSBD method is able to recover the correct birth and death rates from  
132 simulated phylogeny, and is able to estimate the state change rate when it is small.

### 133 **2.2.2 State number and positions**

134 We measure the accuracy of the inference regarding the number of states and the partition of tips  
135 into the different states. We use the Variation of Information (VI) criterion [11] to measure the  
136 distance between the inferred state placement and the truth: a measure of 0 indicates perfect  
137 concordance between the two. The upper bound of the VI distance depends on the number  
138 of states in the colouring and varies between 1.39 for 2 states and 3.22 for 5 states, however  
139 in this paper we have rescaled all VI distances so they range from 0 to 1, in order to make  
140 comparisons easier. VI distances were calculated for each sample of the posterior separately  
141 and on a "consensus" colouring built from the parameter values inferred for each edge. This

142 consensus colouring put tips in the same state if the median estimate of their birth and death  
143 rates were less than 10% apart. Finally, we also estimated the posterior support for pairs of  
144 tips to be in the same state, split by whether these pairs are also in the same state in the true  
145 colouring.

146 Results are shown in Figures 4 and 5. The first finding is that the number of states inferred  
147 by MSBD is not a reliable estimate of the underlying process (Figure 4, right). In particular, the  
148 median estimate is similar for all datasets. Thus it should not be considered a good indicator of  
149 how many diversification regimes are in the process. The VI distance also shows discrepancies  
150 between the sampled clusterings and the truth on all datasets, in particular on the dataset with  
151 high  $\gamma$ , the dataset with 5 states and datasets with identical birth rate and different death rates  
152 (Figure 4, left). The consensus clustering however is closer to the truth on all datasets, which  
153 confirms that birth and death rate estimates are reliable. Due to the model, many simulated  
154 trees contains small clades of one state nested within another state. We expect these clades  
155 to be difficult to detect, as they cause small differences in the probability density. To test this  
156 hypothesis, we excluded all clades which contained less than 6 nodes (internal nodes included)  
157 from the true colouring, by attributing the tips of that clade to the ancestor state instead. Thus  
158 the tips belonging to small clades are not removed but simply recoloured (indicated as “With  
159 recolouring” in Figures 4 and 5). We observe a marked improvement in similarity when using this  
160 method, confirming that those small clades are unlikely to be detected by the MSBD inference.  
161 As seen earlier, the death rate estimates are less accurate than the birth rate estimates, and  
162 this is reflected by these results as well: the inference cannot easily distinguish between two  
163 states when when the death rates are different but the birth rates are identical even when those  
164 two states are clearly delimited in the tree (see row 4 of Figure 4). In conclusion, when states  
165 differ by their birth rates, the consensus colouring represents an accurate estimate of the original  
166 colouring, especially when excluding smaller clades. The quality of the inference is however much  
167 worse on states which only differ by their death rates.

168 We also looked at the posterior support for pairs of tips being in the same state, shown in  
169 Figure 5: if the inferred colouring is accurate, we expect pairs which are in the same state in  
170 the true colouring (in red in the figure) to have much higher support than pairs in different true  
171 states (in green in the figure). The results are consistent with the previous findings, showing

172 that the posterior support reflects the true state partition if small clades are excluded and states  
173 have different birth rates.

### 174 **2.2.3 Tip state inference**

175 Figure 6 shows an example of the posterior distribution on the birth rate for one tip of a tree.  
176 The tree was originally simulated with parameters  $\lambda_1 = 1$ ,  $\lambda_2 = 10$ ,  $\mu = 0.5$  and  $\gamma = 2.61$ . The  
177 figure shows a clear bimodal distribution, which is indicative that the inference has identified (at  
178 least) two separate diversification regimes across the tree, but that there is uncertainty on which  
179 regime this specific tip belongs to.

180 This figure illustrates both the power of the MSBD inference, which is able to infer complex  
181 and nuanced evolutionary dynamics, and the complexity involved in interpreting the results. The  
182 median of the posterior is here 8.0, which corresponds to the most sampled state for this tip,  
183 but entirely misses the state with lower lambda. The 95% HPD interval is [0.0011; 9.94], which  
184 covers both states but gives no indication that the distribution is bimodal. Finally, the mean  
185 estimate is 6.0, which is a misleading summary of the distribution.

186 In this work we have used the median estimates to measure the accuracy of the inference, as  
187 it is the most representative of the configuration with the most posterior support. However, one  
188 should keep in mind that commonly used summary statistics can be flawed when summarizing  
189 distributions which are strongly multimodal.

## 190 **2.3 Empirical datasets**

191 We re-analyzed two empirical trees which were originally analyzed using BAMM: a phylogeny of  
192 hummingbird species obtained from [12] and a phylogeny of scincid lizards obtained from [13].  
193 Both trees contain only extant species, with sampling proportions respectively  $\rho = 0.86$  and  
194  $\rho = 0.85$ . In both analyses, the sampling proportions were fixed to the truth and the priors for  
195 the birth and death rates were set to LogNormal(1.5,2.0). The tree topology was fixed and the  
196 prior on  $n^*$  was set to Poisson(4). The prior on  $\gamma$  was set to LogNormal(-4.0,1.0). We also  
197 performed a second analysis on the lizards phylogeny using the priors on birth rate and death  
198 rate which were originally used with BAMM, i.e Exponential(1.0) for both rates. Priors for  $\gamma$



199 and  $n^*$  were set to the same value as the previous analysis. The BAMM settings used on the  
200 hummingbirds phylogeny are not publicly available, so a similar analysis was not possible.

201 Average diversification rates per edge, weighted by the edge length, were logged for each  
202 edge. Figure 7, parts A and B, shows the results of the MSBD inference with lognormal priors  
203 on both empirical phylogenies, summarized as the median of the average diversification rate for  
204 each edge.

205 The hummingbirds inference (part A) shows some similarities with the original analysis by  
206 BAMM, but also differences. The diversification rates inferred by BAMM lied between 0.1 and  
207 0.4, consistent with our results. BAMM also found strong posterior support for between 2  
208 and 4 states with elevated diversification in the clade that includes Bees, Mountain Gems, and  
209 Emeralds, with particularly strong support for the Bees clade having a distinct diversification  
210 regime. In accordance with those results, the MSBD inference identifies 3 clades with elevated  
211 diversification rate, the Bees clade and 2 subclades of the Emeralds family. The main difference  
212 between the two inferences is that our method finds no evidence for time-dependency in the  
213 diversification rates, contrary to BAMM which infers an average speciation decay of 0.35 to 0.15  
214 over 25 Myrs, corresponding to an exponential decay rate of 0.034 across the tree.

215 On the lizard phylogeny (part B), the results are quite different from the original analysis  
216 performed using BAMM. BAMM found strong support for two distinct configurations, one con-  
217 figuration with separate diversification regimes in the Lerista and Ctenotus clades and the rest  
218 of the tree, and one configuration with separate diversification regimes in the Lerista clade, the  
219 Ctenotus clade and the rest of the tree. MSBD on the other hand shows no evidence of separate  
220 diversification regimes in the tree, and infers a median speciation rate of 0.125 and a median  
221 extinction rate of 0.005 across the entire phylogeny. Similarly to the hummingbirds dataset, our  
222 method also detects no time-dependency in the diversification rate, although BAMM infers an  
223 average speciation decay rate of 0.2.

224 As time-dependency is not explicitly modelled in the MSBD inference, detecting it requires  
225 inferring widespread state changes across the tree. Thus the absence of time-dependency in our  
226 original inference could be due to the prior on  $\gamma$  being too low, and thus moving the inference  
227 away from this configuration. To test this hypothesis, we also ran an analysis with a much higher  
228 prior on  $\gamma$ , set to LogNormal(4.0,1.0). The results are shown in Figure 7, parts C and D. With

229 the higher prior on  $\gamma$ , we can indeed recover signal for time-dependency in the lizards phylogeny,  
230 with edges close to the tips inferred to have a lower diversification rate than edges closer to the  
231 backbone of the tree. On the other hand, the hummingbirds phylogeny still shows no strong  
232 evidence for time-dependency, and no longer detects the clades identified as under different  
233 diversification regimes by the previous analysis. Thus it appears that when time-dependency  
234 is absent or weak, higher priors on  $\gamma$  can lead to a significant amount of noise and to the loss  
235 of signal for particular clades having different rates. This also illustrates the necessity of being  
236 careful when summarizing results from the MSBD inference, as a more in-depth analysis shows  
237 that edges in the hummingbirds phylogeny actually show a strong bimodal distribution which is  
238 very similar from edge to edge. The strong differences apparent in Figure 7, part C are in fact  
239 due to small variations in this bimodal distribution which lead the median to switch from one  
240 mode to the other.

241 Similar results were obtained when summarizing based on the median speciation and extinc-  
242 tion rate, as well as when using the same priors as the original BAMM analysis. They are shown  
243 in Figures S2-S5.

### 244 **3 Discussion**

245 We have presented a new multi-state birth-death model for Bayesian inference of lineage-specific  
246 birth and death rates. The model is composed of multiple states, each associated with a specific  
247 birth and death rate, as well as a state change rate. The positions and times of state changes  
248 on the phylogeny then define to which state each lineage belongs to. The MSBD model thus  
249 represents a discretization of the true evolutionary process as a series of separate evolutionary  
250 regimes.

251 We have shown on simulated datasets that the MSBD inference can accurately estimate birth  
252 and death rates, and that those estimates can be used to build an accurate partition of the tree  
253 into states. However, our results also show that the MSBD inference cannot detect clades with  
254 different rates if the clades have very few tips. This is expected, as the method relies on the  
255 pattern of relative edge lengths to infer rates, thus small clades will not have enough signal to  
256 be inferred. Additionally, death rates estimates are less accurate than birth rates estimates in

257 all simulation conditions. This in turn leads to lower accuracy in the inference of the colouring  
258 of the tree in datasets where states only differ by death rate, with many trees being inferred as  
259 presenting only one state.

260 The empirical analyses show two very different situations when using the default priors: on  
261 the hummingbirds dataset, our method and BAMM reach similar conclusions both regarding the  
262 presence and positions of separate diversification regimes and the parameter estimates. On the  
263 lizards phylogeny however, BAMM and MSBD obtain very different results, with MSBD finding  
264 no evidence of either rate changes or time-dependent rates. Further analyses on the empirical  
265 datasets show that MSBD is able to infer a pattern of time-dependent rates in a piecewise  
266 manner if there is signal for it, however this requires the prior for  $\gamma$  to be set much higher than  
267 for detecting single clades with different diversification regimes. It appears from our analysis  
268 that setting the prior in this way when no time-dependency is present can lead to noise and  
269 loss of signal. Thus one extension of MSBD will be to solve this issue by explicitly modelling  
270 time-dependent birth and death rates independently from changes in diversification regimes. It  
271 is to be noted that both empirical analysis were originally run with BAMM v1.0.0. BAMM has  
272 undergone significant changes since, including several bugfixes and modifications of the likelihood  
273 function, thus it is possible that the original results do not reflect the results which would be  
274 obtained with the latest version of the method.

275 One important thing to note is that interpreting the results of the MSBD inference requires  
276 more care than for other models, due to two primary reasons. The first is that the states are  
277 not linked to specific tips. If two MCMC samples contain  $k$  states, we cannot determine a  
278 precise correspondence between states in the first sample and states in the second. This problem  
279 is compounded by the variation in the number of states between different samples across the  
280 chain. Thus individual samples may not be a good representation of the overall inference. This  
281 is supported by the results shown in Figure 4, where the consensus clustering obtained from the  
282 rate estimates is much closer to the true clustering than the individual colourings sampled in the  
283 posterior.

284 The second reason is that the MSBD inference will frequently produce multi-modal posterior  
285 distributions on the rates associated with specific nodes or edges when the data shows signal for  
286 multiple regimes and there is uncertainty on which regime the node or edge in question belongs to.

287 In these cases, the usual metrics used to describe Bayesian parameter estimates, i.e the median  
288 and HPD interval, give an incomplete picture of the output by failing to distinguish between  
289 uncertainty around the rate estimate and uncertainty on regime attribution. Thus analyzing the  
290 output of the MSBD inference should be tailored to the research question being considered, and  
291 may require different metrics than the ones we have used in this paper.

292 Future work will focus on explicitly implementing time-dependent birth and death rates to  
293 better accommodate situations where diversity-dependent or environment-dependent diversifica-  
294 tion is present, and on expanding the inference options available, in particular regarding sampling  
295 schemes. Currently only state-independent extinct and extant sampling are supported, and these  
296 are assumed to have known (fixed) values. We plan to incorporate a sampling scheme where each  
297 extant tip represents a genus or other group of species, as well as state-dependent sampling rates.

## 298 4 Materials and Methods

### 299 4.1 Multi-states birth-death model

300 We use a multi-states birth-death (MSBD) model with contemporaneous and non-contemporaneous  
301 sampling. This model contains  $n^*$  states, each associated with a specific birth rate  $\lambda_i$  and death  
302 rate  $\mu_i$ ,  $i \in \{1, 2, \dots, n^*\}$ . The process starts with one individual in a state  $r$  picked uniformly at  
303 random from the  $n^*$  possible states, at time  $t_{or} > 0$  in the past. Through time, each individual in  
304 state  $i$  undergoes birth events giving rise to an additional individual in state  $i$  with rate  $\lambda_i$ , and  
305 dies with rate  $\mu_i$ . Additionally, each individual in any state  $i$  undergoes a change in birth and  
306 death rates to a different state  $j$  with rate  $m$ . Thus, the overall rate of change for any individual  
307 is  $\gamma = m(n^* - 1)$ . Note that  $\gamma = 0$  for  $n^* = 1$ . Throughout this paper, we consider  $\gamma$  (and not  
308  $m$ ) as a parameter.

309 The process stops at present time  $t = 0$ . The model includes both extinct and extant  
310 sampling: individuals are sampled upon death with a probability  $\sigma$  and individuals at the present  
311 are sampled with a probability  $\rho$ .

312 The process gives rise to complete trees, displaying all birth, death, state change, and sampling  
313 events (Figure 1, left). The reconstructed tree  $\mathcal{T}$  is obtained by pruning all lineages of the

314 complete tree without sampled descendants (Figure 1, right). By analogy with the figure we  
315 will call the attribution of states to lineages and the position of state changes on the tree the  
316 colouring  $\mathcal{S}$  of the tree.

## 317 4.2 Probability density of a reconstructed tree

318 We derive the likelihood of the MSBD model on a given phylogeny, i.e the probability density of  
319 the reconstructed tree  $\mathcal{T}$  with the colouring  $\mathcal{S}$ , given the values of the birth and death rates for  
320 each state summarized in  $\eta$ :  $f[\mathcal{T}, \mathcal{S}|\eta]$ .

321 We refer to a node in the phylogeny as either a branching event, a tip or a state change  
322 event. Thus the edges of  $\mathcal{T}, \mathcal{S}$  are the edges of  $\mathcal{T}$  subdivided at state change events, and any  
323 edge belongs to only one state.

324 Following [5], we define  $p_i(t)$  as the probability of a lineage in state  $i$  at time  $t > 0$  not  
325 appearing in the reconstructed tree, i.e the probability of this lineage not being sampled before  
326 or at the present. We also define  $q_{i,N}(t)$  as the probability density of a given edge  $N$  in state  $i$   
327 at time  $t > 0$  evolving according to the tree  $\mathcal{T}$  and states  $\mathcal{S}$  between time  $t$  and the present.

328 Note that  $f[\mathcal{T}, \mathcal{S}|\eta] = q_{r,N}(t_{or}) \times g(r)$ , with  $r$  being the root state, and  $g(r)$  being the  
329 probability of the first individual being in state  $r$ . We assume here a uniform distribution, i.e.  
330  $g(r) = \frac{1}{n^*}$ .

331 In a similar fashion to [5], we obtain the ordinary differential equations Eq. 1 for  $p_i(t)$  and  
332 Eq. 2 for  $q_{i,N}(t)$  where  $t \in [t_e; t_s], t_s > t_e$  with  $t_e$  and  $t_s$  respectively the end and start times of  
333 edge  $N$ :

$$\begin{aligned} \frac{dp_i}{dt}(t) &= -(\gamma + \lambda_i + \mu_i)p_i(t) + \mu_i + \lambda_i p_i(t)^2 + \sum_{j \neq i} \frac{\gamma}{n^* - 1} p_j(t), \\ p_i(0) &= 1 - \rho, \end{aligned} \tag{1}$$

334 and

$$\begin{aligned}
 \frac{dq_{i,N}}{dt}(t) &= -(\gamma + \lambda_i + \mu_i)q_{i,N}(t) + 2\lambda_i q_{i,N}(t)p_i(t), \\
 q_{i,N}(0) &= \rho && \text{if } N \text{ leads to a tip at the present } t_e = 0, \\
 q_{i,N}(t_e) &= \mu_i \sigma && \text{if } N \text{ leads to a tip at time } t_e > 0, \\
 q_{i,N}(t_e) &= \lambda_i q_{i,N'}(t_e) q_{i,N''}(t_e) && \text{if } N \text{ branches at } t_e > 0 \text{ into } N' \text{ and } N'', \\
 q_{i,N}(t_e) &= \frac{\gamma}{n^* - 1} q_{j,N}(t_e) && \text{if } N \text{ changes from state } j \text{ to } i \text{ (forward in time) at } t_e > 0.
 \end{aligned}
 \tag{2}$$

335 These ordinary differential equations do not have an analytical solution. Numerical inte-  
 336 gration is computationally expensive and can be unstable for certain parameters. Thus, in our  
 337 implementation, we make the assumption that no state changes happen in the unsampled parts  
 338 of the tree, meaning we observe all state changes in the reconstructed tree. With this assumption,  
 339 the differential equation for  $p_i(t)$  simplifies to Eq. 3.

$$\begin{aligned}
 \frac{dp_i}{dt}(t) &= -(\gamma + \lambda_i + \mu_i)p_i(t) + \mu_i + \lambda_i p_i(t)^2 \\
 p_i(0) &= 1 - \rho
 \end{aligned}
 \tag{3}$$

340 With this approximation we can derive an analytical solution for  $p_i(t)$ :

$$\begin{aligned}
 p_i(t) &= -\frac{1}{\lambda_i} \frac{(y_i + \lambda_i(1 - \rho))x_i e^{-ct} - y_i(x_i + \lambda_i(1 - \rho))}{(y_i + \lambda_i(1 - \rho))e^{-ct} - (x_i + \lambda_i(1 - \rho))}, \\
 \text{where } c &= \sqrt{(\gamma + \lambda_i + \mu_i)^2 - 4\mu_i(1 - \sigma)\lambda_i}, \\
 x_i &= \frac{-(\gamma + \lambda_i + \mu_i) - c}{2}, \quad \text{and} \quad y_i = \frac{-(\gamma + \lambda_i + \mu_i) + c}{2}.
 \end{aligned}
 \tag{4}$$

341 Using Equation (4) in the differential equation for  $q_{i,N}(t)$  (Equation 2) allows us to derive  
 342  $q_{i,N}(t)$  analytically:

$$q_{i,N}(t) = q_{i,N}(t_e) e^{c(t_e - t)} \left( \frac{(y_i + \lambda_i(1 - \rho))e^{-ct_e} - x_i - \lambda_i(1 - \rho)}{(y_i + \lambda_i(1 - \rho))e^{-ct} - x_i - \lambda_i(1 - \rho)} \right)^2
 \tag{5}$$

343 For an edge  $N$  in state  $i$  which starts at time  $t_s$  and ends at time  $t_e$  ( $t_s > t_e$ ),  $q_{i,N}(t_s)$  is the  
 344 likelihood of the full subtree descending from edge  $N$ . The likelihood of edge  $N$  can be obtained

345 as  $f_N = \frac{q_{i,N}(t_s)}{q_{i,N}(t_e)} = e^{c(t_e-t_s)} \left( \frac{(y_i + \lambda_i(1-\rho))e^{-ct_e} - x_i - \lambda_i(1-\rho)}{(y_i + \lambda_i(1-\rho))e^{-ct_s} - x_i - \lambda_i(1-\rho)} \right)^2$ .

346 This allows us to write the probability density of the phylogeny  $\mathcal{T}$  and the state changes  
 347 assigned to the lineages  $\mathcal{S}$ , with  $N_i$  being the set of edges in state  $i$ ,  $B_i$  being the set of birth  
 348 events in state  $i$  (and for each event  $b \in B_i$ ,  $t_b$  the time of this event),  $S_i$  being the set of extinct  
 349 tips in state  $i$ ,  $n_{ext}$  being the number of extant tips, and  $k$  being the number of state change  
 350 events:

$$f(\mathcal{T}, \mathcal{S} | \eta = (\lambda, \mu, \gamma)) = \prod_i \left[ \prod_{N \in N_i} f_N \times \prod_{b \in B_i(\mathcal{T})} \lambda_i(t_b) \times \prod_{s \in S_i(\mathcal{T})} \sigma \mu_i \right] \times \left( \frac{\gamma}{n^* - 1} \right)^k \times \rho^{n_{ext}} \quad (6)$$

351 Note that if  $n^* = 1$ , then  $k = 0$  and the term  $\left( \frac{\gamma}{n^* - 1} \right)^k$  is removed from Equation 6. Note also  
 352 that if the tree starts with 2 lineages at time  $t_1$  instead of 1 lineage at time  $t_{or}$ , the likelihood  
 353 becomes  $\frac{1}{\lambda_r} f(\mathcal{T}, \mathcal{S} | \eta = (\lambda, \mu, \gamma))$ .

### 354 4.3 Bayesian inference

We implemented our model in a Bayesian framework as an add-on to the popular MCMC in-  
 ference software BEAST2 [14], which allows to estimate  $\mathcal{S}$  and  $\eta$  from a phylogeny based on  
 Equation 6. The inference can be performed on a fixed tree  $\mathcal{T}$ , or directly on sequences, in which  
 case  $\mathcal{T}$  is inferred jointly with the other parameters using the substitution and clock models  
 provided by BEAST2. In a joint inference, we sample from the following distribution:

$$f(\mathcal{T}, \mathcal{S}, \eta, \theta | D) = \frac{P(D | \mathcal{T}, \theta) f(\mathcal{T}, \mathcal{S} | \eta) f(\eta) f(\theta)}{P(D)}$$

355 with the data  $D$  being the sequence alignment,  $\theta$  being the parameters of the sequence evolution  
 356 model, and  $f(\eta) f(\theta)$  being the prior distributions for the model parameters, and  $f(D | \mathcal{T}, \theta)$  being  
 357 Felsenstein's likelihood for the sequencing data. If we condition on a fixed tree  $\mathcal{T}$ , we use  $D = \mathcal{T}$ .

358 While we infer  $n^*$  for our data, the number of states assigned to the reconstructed phylogeny,  
 359  $n$ , may be smaller than  $n^*$ , i.e.  $n \leq n^*$ . To reduce the complexity of the computation, we do not  
 360 sample the birth and death rates associated with the states which are not currently assigned to

361 the tree, and instead marginalize over those rates. This marginalization introduces an additional  
362 term  $\frac{(n^* - 1)!}{(n^* - n)!}$  to the probability density to account for the sampling of  $n^* - n$  unassigned states.

363 It has been shown that in unstructured models, the three parameters  $\lambda, \mu$  and  $\sigma$  are not  
364 identifiable [15]. In order to avoid potential parameter correlations in the structured model, we  
365 require the sampling probabilities  $\rho$  and  $\sigma$  to be provided as inputs.

366 More details on the implementation can be found in the Supplement.

## 367 4.4 Simulation study

368 To study the behaviour of our method, we simulated trees under our model using a range of  
369 parameter values. We used a stochastic forward in time simulation process which takes the  
370 following inputs:

- 371 • a stopping condition: the process is stopped upon reaching a certain number of tips or  
372 after a certain time had passed
- 373 • a rate  $\gamma$  of state change
- 374 • the total number of states in the process  $n^*$
- 375 • a function to sample birth rates and death rates for all states
- 376 • sampling rates or sampling numbers for the extant tips and extinct tips

377 The birth-death process is started with either one or two lineages and is simulated with the  
378 Gillespie algorithm until the stopping condition is met or all lineages descending from one of the  
379 starting lineages have gone extinct, in which case the resulting tree is discarded. At the end of the  
380 process, lineages are discarded based on the sampling settings to obtain the reconstructed tree.  
381 If the sampling settings lead to no lineages being sampled, the resulting tree is also discarded.

### 382 4.4.1 Validation: sampling from prior

383 To ensure that the implementation of our model is correct, we performed a comparison of the  
384 distribution of trees obtained from forward in time simulations of the process to the distribution  
385 obtained from running an MCMC inference without sequence data under our model with the  
386 same priors. This “sampling from the prior” procedure has been described in [16].



387 We performed two sets of simulations, one with death (i.e  $\mu_i > 0 \quad \forall i$ ) and one without  
388 death (i.e  $\mu_i = 0 \quad \forall i$ ). The distributions obtained without death should match if the model is  
389 correctly implemented, however we expect a discrepancy when simulating with death, due to the  
390 approximation made in the probability density function employed by the MCMC.

391 The number of tips was fixed to 50, and  $t_{mrca}$  was fixed to 1.0. The priors used were the  
392 following: LogNormal(1.5,1.0) for the birth rates  $\lambda_i$  and LogNormal(1.0,1.0) for the state change  
393 rate  $\gamma$ . The prior for the death rates  $\mu_i$  was the Dirac function  $\delta_0$  in simulations without death  
394 and LogNormal(-1.0,0.5) in simulations with death. The prior on  $n^*$  was set to Poisson(4).

395 The forward in time simulation was performed as follows. Parameters for five different states  
396 were drawn from the prior distributions, then a tree was simulated starting with two lineages in  
397 the same state, with this initial state being chosen uniformly at random. The simulation was  
398 stopped after a time  $t = 1.0$ , or when all lineages had gone extinct. The simulated tree was kept  
399 in the dataset if the following two conditions were met: the number of extant tips was  $n = 50$  and  
400 the time of the most recent common ancestor  $t_{mrca} = 1.0$ , i.e neither of the original two lineages  
401 had gone fully extinct. New parameters were drawn from the priors for the next simulation,  
402 independent of the previous draw having resulted in a tree which was kept or not.

403 We assessed the match between the two distributions of trees on two measures: the gamma  
404 statistic, which measures the balance of recent branching events in a tree against older events,  
405 and the colless statistic, which measures the left-right balance of lineages in a tree. To assess the  
406 sampling of state positions we also compared the distribution for the number of tips in the state  
407 with the maximum number of tips and the number of sampled states.

#### 408 **4.4.2 Accuracy of the inference**

409 We assessed the quality of the MSBD inference on simulated datasets covering a range of possible  
410 configurations: constant birth and death rates, multiple states with different birth rates, multiple  
411 states with different death rates, and multiple states with different birth and death rates. Some  
412 of these datasets were simulated using the forward in time process described previously. Our  
413 parameter choices for  $\lambda$  and  $\mu$  are displayed in Figure 3. In short, we performed one set of  
414 simulations with  $\gamma = 0$ . Then we performed a set of simulations with two different birth rates  
415 ( $\lambda_1 = 1, \lambda_2 = 10, \mu = 0.5$ ). Next we performed a set of simulations with two death rates,

416 where the net diversification (birth-death) matched the simulation with the birth rate variation  
417 ( $\lambda = 10.5, \mu_1 = 10, \mu_2 = 1$ ). The rationale for keeping the net diversification the same was to  
418 investigate the difference of performance of the method when varying birth vs. death rates in  
419 the light of as few changes as possible across the simulations. Finally we did a set of simulations  
420 with 5 birth rates and one death rate. We chose “low” and “high” values of  $\gamma$  such that the  
421 resulting trees would contain respectively between 1 and 3 state changes and between 10 and 14  
422 state changes on average, excluding the changes on edges leading to tips. The “low” value was  
423 thus set to 0.2 for datasets with 2 states, and 0.29 for the dataset with 5 states, while the “high”  
424 value was set to 2.61.

425 This process often led to trees where one of the states only covered a small portion of the  
426 tree, and so there was little signal for the presence of two states. To address this issue, we  
427 also simulated so-called joined trees, which were made of two trees simulated separately under a  
428 constant birth-death process. The root of the smaller tree was then attached to the bigger tree  
429 such that the resulting tree was ultrametric. These joined datasets were thus characterized by  
430 the proportion  $p$  of tips in state 1 rather than by a change rate  $\gamma$ .

431 No sequences were simulated, and all analyses were performed with fixed tree topologies.  
432 Thus we estimated  $\mathcal{S}$  and  $\eta$  for a fixed tree  $\mathcal{T}$ . We measured the accuracy of the parameter  
433 estimates as well as the colouring  $\mathcal{S}$ .

## 434 5 Funding statement

435 JBS and TS are supported in part by the European Research Council under the Seventh Frame-  
436 work Programme of the European Commission (PhyPD: grant agreement number 335529).

## 437 6 Data accessibility

438 All simulations and analyses were done using custom R scripts. These scripts and the datasets  
439 are included in the Supplementary Materials. The method is publicly available as the BEAST2  
440 package MSBD.

## 441 References

- 442 [1] Maddison WP (2006) Confounding asymmetries in evolutionary diversification and character  
443 change. *Evolution* 60(8):1743–1746.
- 444 [2] Maddison WP, Midford PE, Otto SP (2007) Estimating a binary character’s effect on spe-  
445 ciation and extinction. *Systematic biology* 56(5):701–10.
- 446 [3] FitzJohn RG (2012) Diversitree : comparative phylogenetic analyses of diversification in R.  
447 *Methods in Ecology and Evolution* 3(6):1084–1092.
- 448 [4] Stadler T, Bonhoeffer S (2013) Uncovering epidemiological dynamics in heterogeneous host  
449 populations using phylogenetic methods. *Philosophical Transactions of the Royal Society B:*  
450 *Biological Sciences* 368(1614).
- 451 [5] Kühnert D, Stadler T, Vaughan TG, Drummond AJ (2016) Phylodynamics with Migra-  
452 tion: A Computational Framework to Quantify Population Structure from Genomic Data.  
453 *Molecular biology and evolution* 33(8):2102–2116.
- 454 [6] Rabosky DL, Goldberg EE (2015) Model Inadequacy and Mistaken Inferences of Trait-  
455 Dependent Speciation. *Systematic biology* pp. 1–50.
- 456 [7] Beaulieu JM, O’Meara BC (2016) Detecting Hidden Diversification Shifts in Models of  
457 Trait-Dependent Speciation and Extinction. *Systematic Biology* 65(4):583–601.
- 458 [8] Rabosky DL, et al. (2013) Rates of speciation and morphological evolution are correlated  
459 across the largest vertebrate radiation. *Nature communications* 4:1958.
- 460 [9] Moore BR, Höhna S, May MR, Rannala B, Huelsenbeck JP (2016) Critically evaluating the  
461 theory and performance of Bayesian analysis of macroevolutionary mixtures. *Proceedings of*  
462 *the National Academy of Sciences* 113(34):9569–9574.
- 463 [10] Rabosky DL, Mitchell JS, Chang J (2017) Is BAMM Flawed? Theoretical and Practical Con-  
464 cerns in the Analysis of Multi-Rate Diversification Models. *Systematic Biology* 66(4):477–  
465 498.

- 466 [11] Meilă M (2003) Comparing clusterings by the variation of information in *Learning Theory*  
467 *and Kernel Machines*, eds. Schölkopf B, Warmuth MK. (Springer Berlin Heidelberg, Berlin,  
468 Heidelberg), pp. 173–187.
- 469 [12] McGuire JA, et al. (2014) Molecular phylogenetics and the diversification of hummingbirds.  
470 *Current Biology* 24(8):910–6.
- 471 [13] Rabosky DL, Donnellan SC, Grundler M, Lovette IJ (2014) Analysis and visualization of  
472 complex Macroevolutionary dynamics: An example from Australian Scincid lizards. *Sys-*  
473 *tematic Biology* 63(4):610–627.
- 474 [14] Bouckaert R, et al. (2014) Beast 2: A software platform for bayesian evolutionary analysis.  
475 *PLoS Comput Biol* 10(4):1–6.
- 476 [15] Stadler T, Kühnert D, Bonhoeffer S, Drummond AJ (2013) Birth-death skyline plot reveals  
477 temporal changes of epidemic spread in HIV and hepatitis C virus (HCV). *Proceedings of*  
478 *the National Academy of Sciences of the United States of America* 110(1):228–33.
- 479 [16] Vaughan TG, Kühnert D, Poppinga A, Welch D, Drummond AJ (2014) Efficient Bayesian  
480 inference under the structured coalescent. *Bioinformatics (Oxford, England)* 30(16):2272–9.

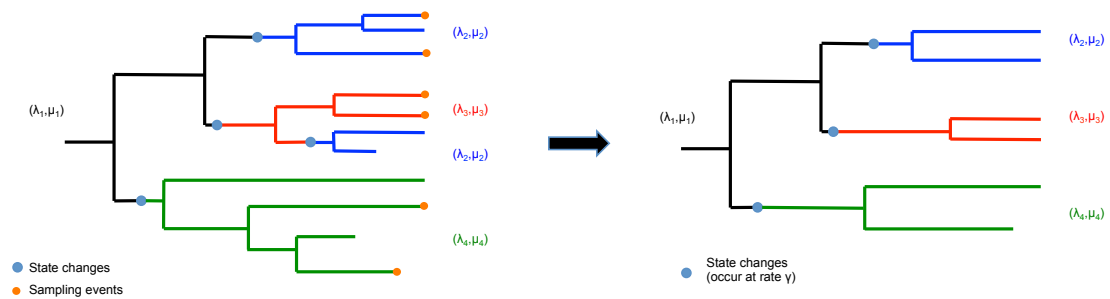

Figure 1: Visual representation of the multi-state birth-death model on a complete tree (left) with sampling events indicated in orange, and on the corresponding reconstructed tree (right). Each state is represented by a colour: the ancestral state, in black, starts at the root. The other states, in blue, red and green, start at change points along the tree. The same state can be present in multiple clades along the tree, such as the blue state in the complete tree.

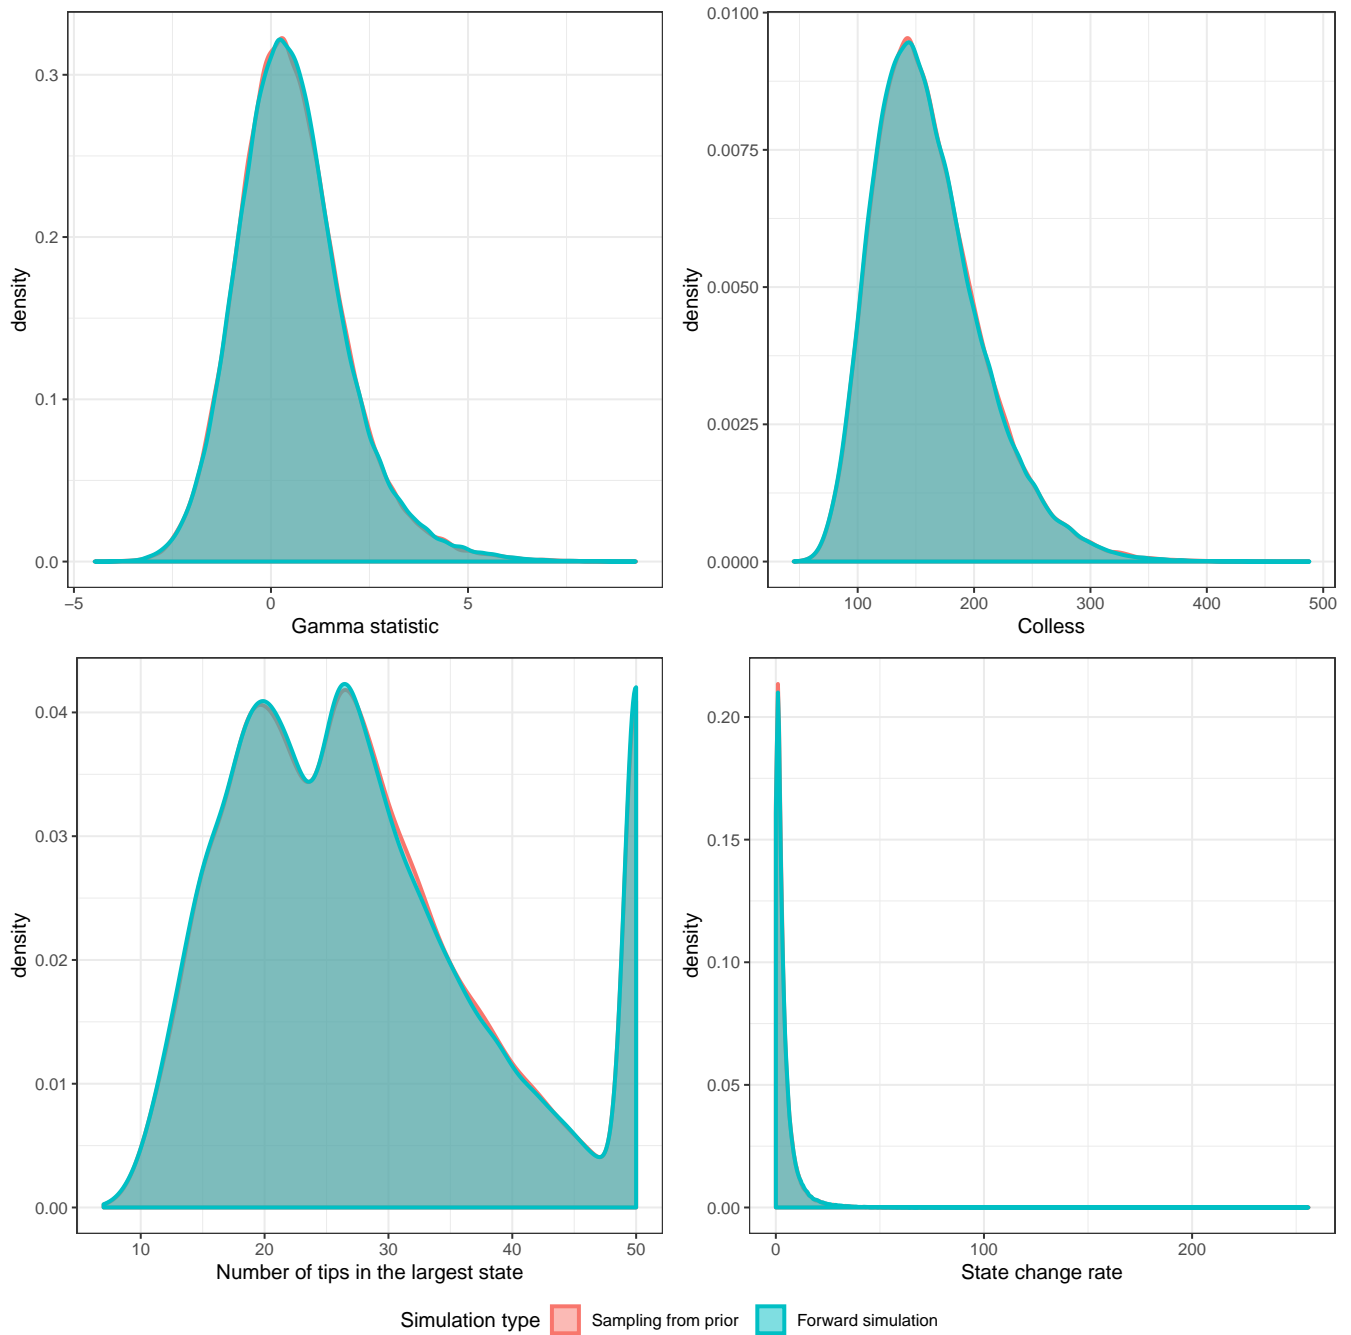

Figure 2: Comparison of the distributions of multiple summary statistics on trees obtained from forward simulation (in green) and MCMC sampling from the prior (in red) under a pure-birth MSBD process.

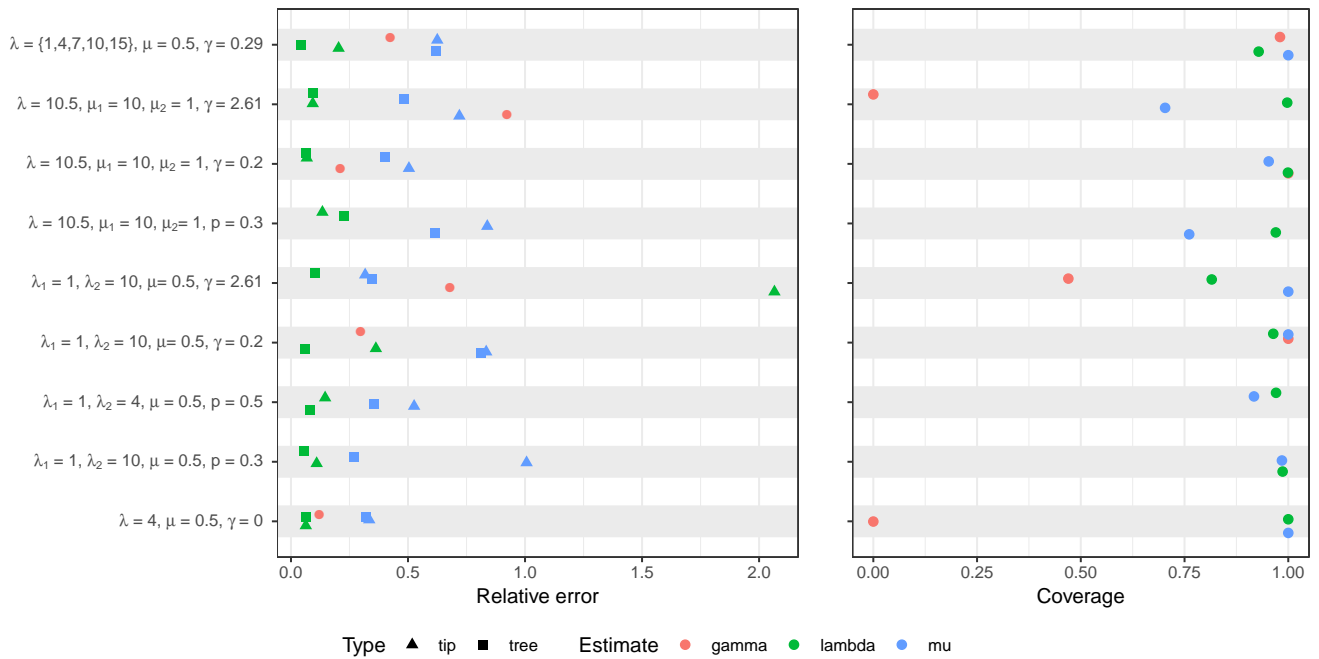

Figure 3: Performance of the birth, death and state change rates inference on different datasets. All measures are averages over 100 trees, with 200 tips for the datasets with 1 or 2 states and 500 tips for the dataset with 5 states.

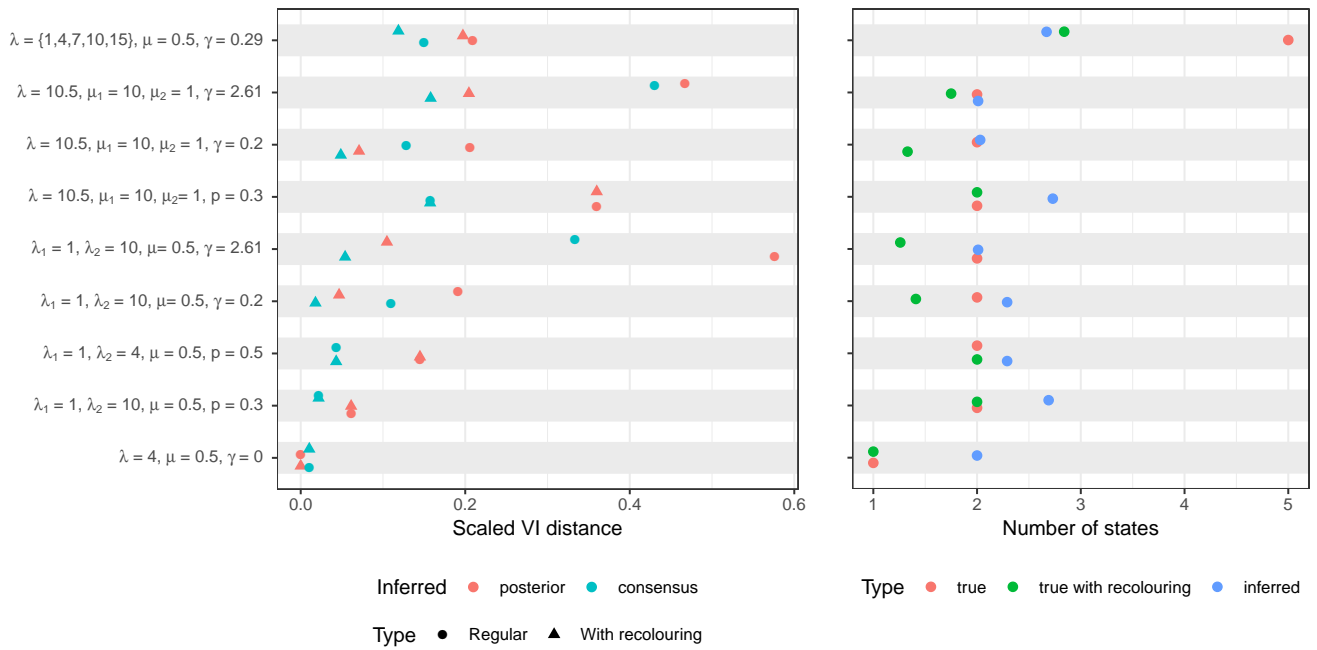

Figure 4: Performance of the state number and colouring inference on different datasets. All measures are averages over 100 trees, with 200 tips for the datasets with 1 or 2 states and 500 tips for the dataset with 5 states.



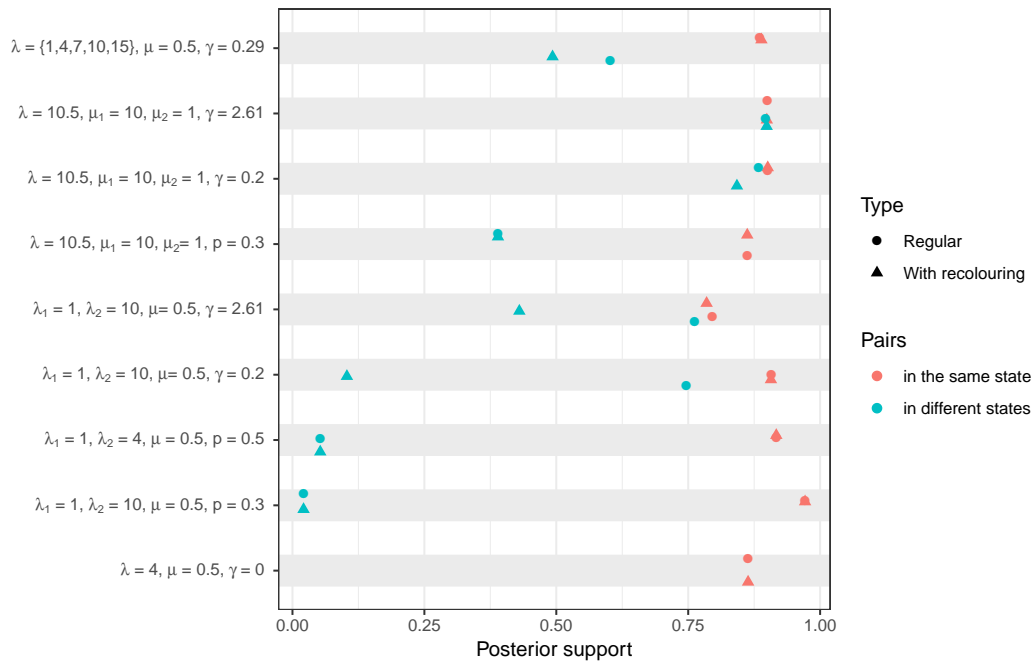

Figure 5: Posterior support for pairs of tips being inferred in the same state over different datasets. All measures are averages over 100 trees, with 200 tips for the datasets with 1 or 2 states and 500 tips for the dataset with 5 states.

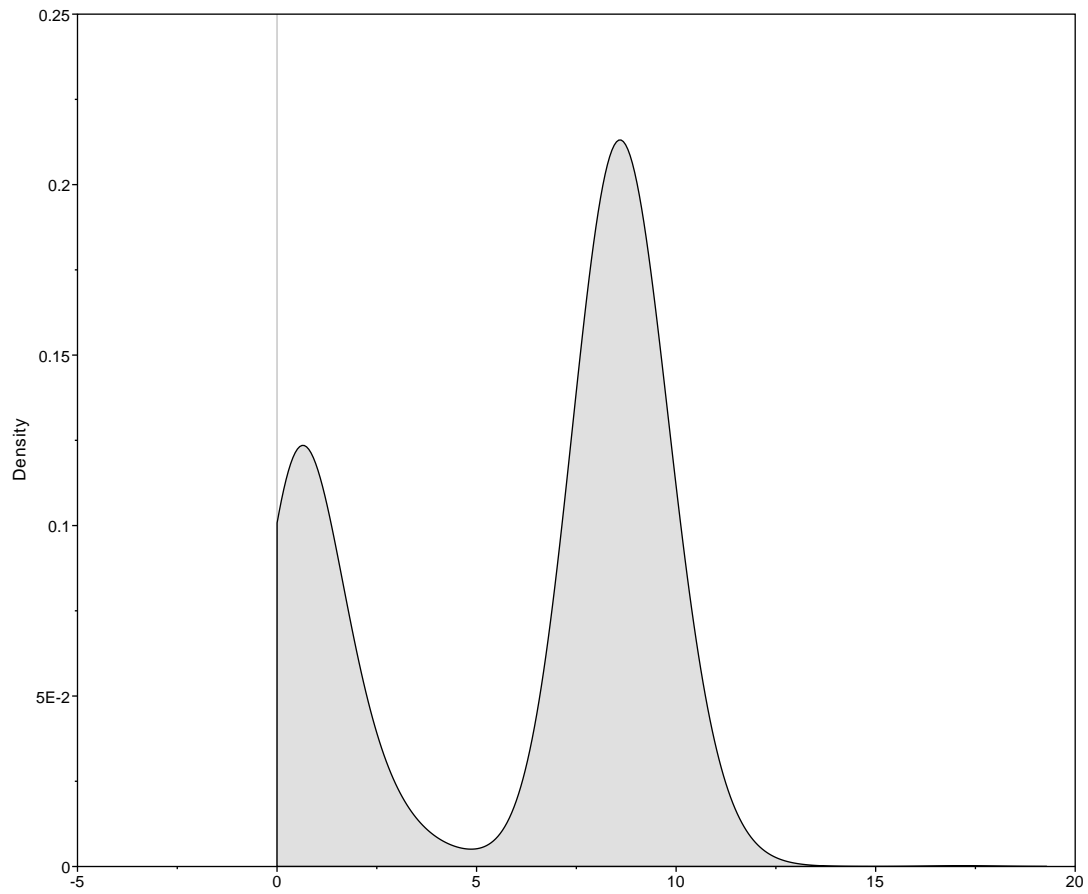

Figure 6: Bimodal posterior distribution of the birth rate on one tip of the tree, as inferred by the MSBD method.

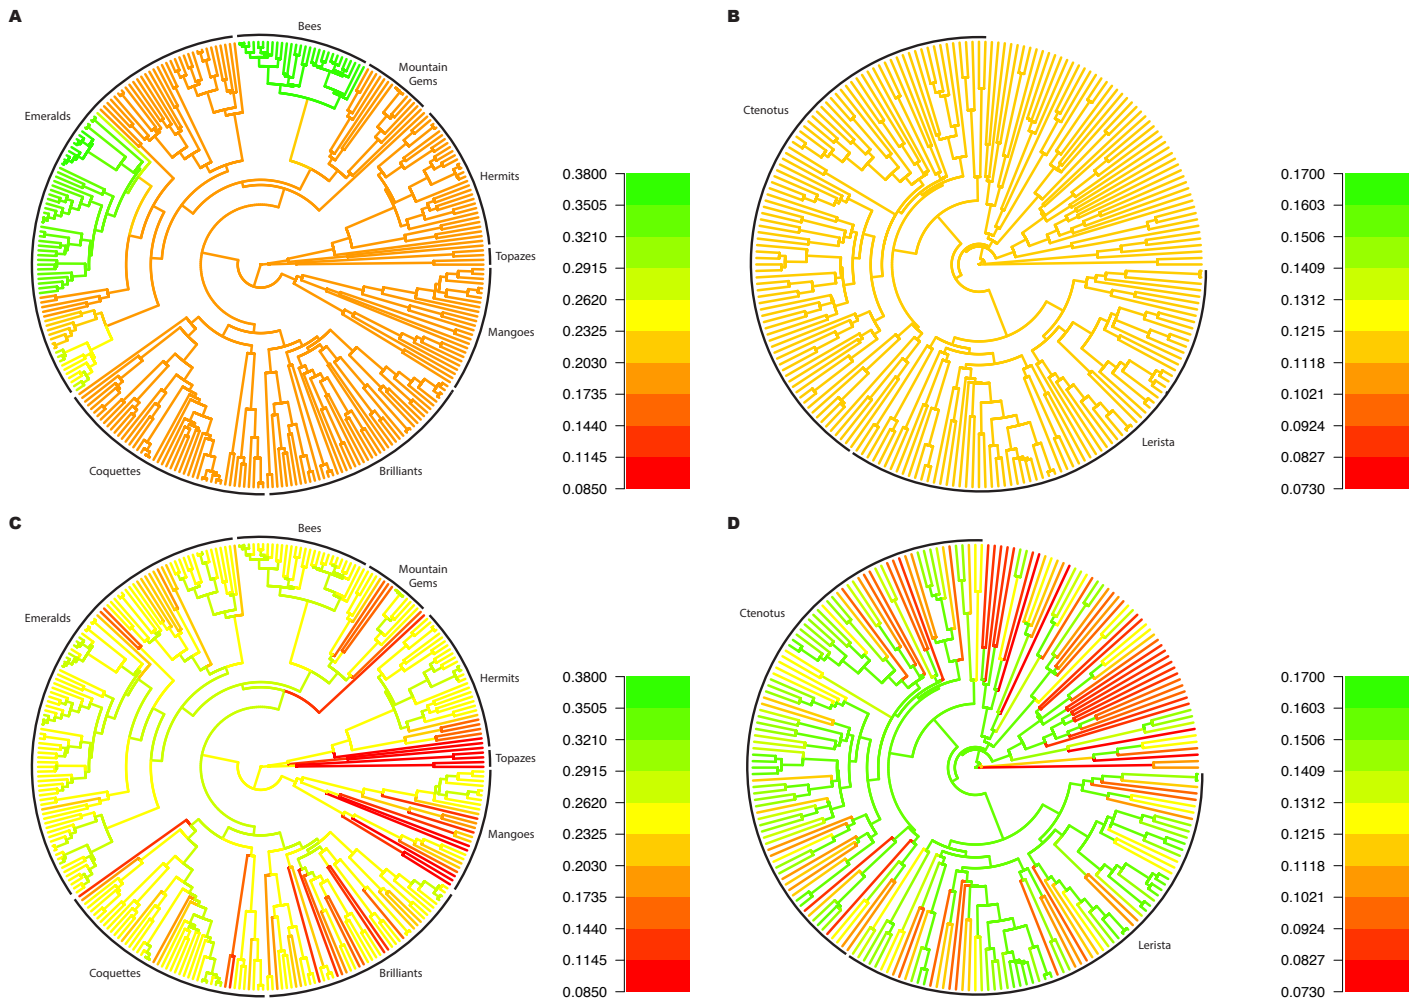

Figure 7: Empirical hummingbirds phylogeny (parts A, C) and lizards phylogeny (parts B, D) coloured by the median diversification rate inferred by MSBD for each edge. Inferences were run with a prior favoring low values of  $\gamma$  (parts A, B) or higher values of  $\gamma$  (parts C, D).
